# Supplementary material
Source: publisher figshare collection journal article supplement (https://acs.figshare.com/ndownloader/files/14400080)
Supplement: Supplementary file 1 [file 14400080]

# Supporting Information

## **Transparent Bioreactor Based on Nanoparticle-Coated Liquid Marble for in Situ Observation of Suspending Embryonic Body Formation and Differentiation**

Kejun Lin,<sup>†,‡,§</sup> Ruoyang Chen,<sup>†,‡</sup> Liyuan Zhang,<sup>\*,†,‡,†</sup> Duyang Zang,<sup>\*,§</sup> Xingguo Geng,<sup>§</sup>

Wei Shen<sup>\*,†,‡</sup>,

<sup>†</sup> *Department of Chemical Engineering, Monash University, Wellington Road,  
Clayton Campus, Victoria 3800, Australia*

<sup>‡</sup> *Monash Institute of Medical Engineering, Monash University, Wellington  
Road, Clayton Campus, Victoria 3800, Australia*

<sup>§</sup> *Functional Soft Matter & Materials Group, MOE Key Laboratory of  
Material Physics and Chemistry under Extraordinary Conditions, School of  
Science, Northwestern Polytechnical University, Xi'an, 710129, China*

<sup>†</sup> *National Local Joint Engineering Laboratory for Advanced Textile  
Processing and Clean Production, Science & Technology Institute, Wuhan  
Textile University, Jiangxia, Hubei 430200, China*

\*Corresponding authors:

Wei Shen

E-mail: [wei.shen@monash.edu](mailto:wei.shen@monash.edu);

Duyang Zang

E-mail: [dyzang@nwpu.edu.cn](mailto:dyzang@nwpu.edu.cn);

Liyuan Zhang

E-mail: [liyuan.zhang@monash.edu](mailto:liyuan.zhang@monash.edu).

Figure S1. Cell viability obtained from MTT assay after cells cultured in hanging drop and liquid marble.

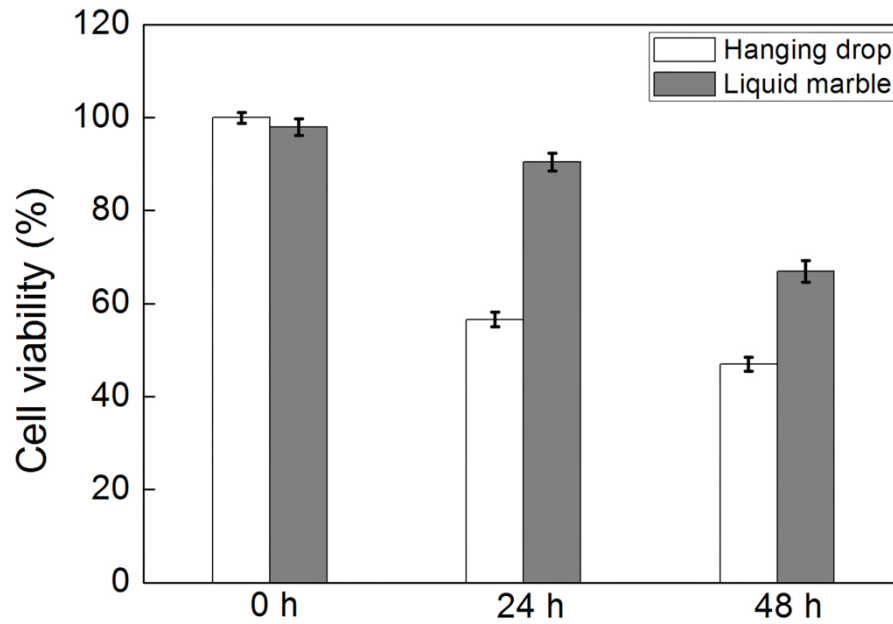

Figure S2. The morphology of cell aggregates after culturing for 48 h in bare sessile drop: (a) before and (b) after sucking the media. Scale bars are 200  $\mu$ m.

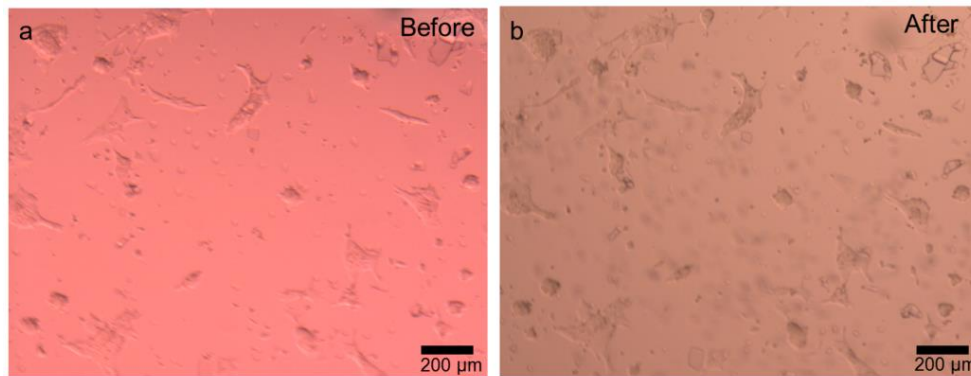

Video S1. Beating of the suspending EB after culturing for 10 days in a liquid marble micro bioreactor.

Video S2. Contracting foci of adhered EB after culturing for 10 days in a bare sessile drop micro bioreactor.
